# Supplementary material for: Quality Control of Oleum Cinnamomi Assisted by Network Pharmacology Strategy
Source: MDPI journal article supplement (doi:10.3390/molecules27196391), 2022-09-27
Supplement: s1 [file s1]

**Table S1. Chemical-target gene database**

| No. | Chemical constituents   | Target gene                                                                                                                                                                                                                                                                                                                                                                                     |
|-----|-------------------------|-------------------------------------------------------------------------------------------------------------------------------------------------------------------------------------------------------------------------------------------------------------------------------------------------------------------------------------------------------------------------------------------------|
| 1   | $\beta$ -Pinene         | SLC5A7/HSD11B1/UGT2B7/PPARA/CNR2/PTGS1/NR1H3/ACHE/SHBG/PTPN1/NR1I3/CYP19A1/ESR1/CHRM2/SLC6A2/SLC6A4/CYP2C19/AR/FAAH/TRPV1                                                                                                                                                                                                                                                                       |
| 2   | Sabinene                | HSD11B1/UGT2B7/PPARA/CNR2/SLC5A7/NR1H3/ACHE/CYP19A1/ESR1/CHRM2/PTGS1/SLC6A2/SLC6A4/CYP2C19/AR/NR1H4/SAE1/UBA2/SHBG/PTGES/AKR1B10/POLB/PTPN1/NR1I3                                                                                                                                                                                                                                               |
| 3   | $\alpha$ -Phellandrene  | PPARA/CNR2/ADORA1/ADORA2A/ADORA3                                                                                                                                                                                                                                                                                                                                                                |
| 4   | $\beta$ -Myrcene        | PPARA/CNR2                                                                                                                                                                                                                                                                                                                                                                                      |
| 5   | Terpinolene             | PPARA/CNR2                                                                                                                                                                                                                                                                                                                                                                                      |
| 6   | 2,3-Dehydro-1,8-cineole | HIF1A/NPC1L1/CYP19A1/TBXA2R/TTL/AR/NR1H3/NR1H2                                                                                                                                                                                                                                                                                                                                                  |
| 7   | Limonene                | PPARA/CNR2/NR1H3/CYP19A1                                                                                                                                                                                                                                                                                                                                                                        |
| 8   | Eucalyptol              | CYP19A1/SHH/CYP51A1/ACHE                                                                                                                                                                                                                                                                                                                                                                        |
| 9   | $\gamma$ -Terpinene     | TRPV1/PLK1/GLI2/GLI1                                                                                                                                                                                                                                                                                                                                                                            |
| 10  | <i>p</i> -Cymene        | CYP2A6/ACHE/TAAR1/PPARA/PTGS1/TRPA1                                                                                                                                                                                                                                                                                                                                                             |
| 11  | 4-Carene                | SLC6A2/SLC6A4/CYP2C19/PPARA/CNR2/ACHE/FAAH/TRPV1/AR/CYP19A1/ESR1/CHRM2                                                                                                                                                                                                                                                                                                                          |
| 12  | 2-Nonanone              | CYP19A1/CA2/CA1/CA4/CES1/CES2/AR/NR1I3/ADH1A/ADH1B/ADH7/SRD5A1/ADH1C/MAOA/MAOB/PGR/HLCS/ABCG2/DRD2/NOS2/MTNR1A/MTNR1B/SIRT2/PSMB5/EPHX2/CNR2/GSK3B/MMP13/MMP1/GRM5/NOTUM/CTSK/PTPRC/PTPRF/CDC25B/TRPA1/DBF4/ALOX5/CHRM1/CYP2C19/SLC6A2/SLC6A3/GSR/PAOX/IKBKB/CA7/JAK1/CA3/JAK2/CA12/CA14/CA9/CA13/CA5B/CHRM2/CHRM3/TTR/CYP17A1/PTGS1/SLC6A4/PTGS2/SRD5A2/ACHE/PARP1/NQO2/P2RX7/FABP4/FABP3/CDC7 |
| 13  | Copaene                 | PPARA/CNR2/AR/CYP19A1/ESR1/CHRM2/ACHE/SLC6A2/SLC6A4/CYP2C19/BCHE/PTPN1/NR1I3/FAAH/TRPV1                                                                                                                                                                                                                                                                                                         |

|    |                                                                 |                                                                                                                                                                                                                                                                                                  |
|----|-----------------------------------------------------------------|--------------------------------------------------------------------------------------------------------------------------------------------------------------------------------------------------------------------------------------------------------------------------------------------------|
| 14 | 4-Thujanol                                                      | TRPM8/CA2/CA1/CA4/AR/CDC25A/CDC25B/NR1I3/SHH/ESR1/ESR2/SHBG/UGT2B7/NR1H3/POLA1/NPC1L1/HSD11B1/NR3C1/NR1H4/GPBAR1/DRD2/NR3C2/PGR/SLC6A3/G6PD/GABBR1/IDO1                                                                                                                                          |
| 15 | Pinocarvone                                                     | PTPN1/FAAH/TRPV1/ACHE/TRPA1                                                                                                                                                                                                                                                                      |
| 16 | Borneol acetate                                                 | ACHE/VDR/PTPN1/HMGCR/CYP19A1/UGT2B7/CDC25A/TBXAS1/POLA1/CYP11B2/PABPC1/TYMS/CTRB1                                                                                                                                                                                                                |
| 17 | Caryophyllene                                                   | PPARA/CNR2/FAAH/TRPV1                                                                                                                                                                                                                                                                            |
| 18 | Terpinen-4-ol                                                   | AR/CYP19A1/CA2/CA1/CA4/RORC/SREBF2/NPC1L1/NR1H3/HMGCR/TRPM8/ESR2/CHRM2/CYP17A1/PTPN1/RO<br>RA/SQLE/DRD2/SLC6A4/CYP51A1/PPARA/PPARD/G6PD/ESR1/ACHE/ADRA2C/HSD17B2/SHBG/SLC6A2/NR3C1<br>/NR3C2/BCHE/PTPRF/PTPN2/PLA2G1B/ACP1/AKR1B10                                                               |
| 19 | Dodecane, 2-methyl-                                             | -                                                                                                                                                                                                                                                                                                |
| 20 | Myrtenal                                                        | CYP19A1/SRD5A2/FAAH/TRPV1/CYP17A1/ADH1A/SIGMAR1/AR/NPC1L1/PTGES/HSD17B3/ADORA3/MAPK3/P<br>RKCH/HSD11B2/CDC25A/PTPN11/AKR1B10/PTGS1/BCHE/PTPN2/BACE1/CTSD/ESR1/ESR2/TRPA1/ADH1B/AD<br>H1C/HSD11B1/RORA/PTPN6/FNTA/FNTB/FDFT1/DRD2/DRD4/PARP1/SRD5A1                                               |
| 21 | Butanedioic acid, 2,3-bis(acetyloxy)-                           | KDM5A/JMJD1C/CA2/CA12/ABCB1                                                                                                                                                                                                                                                                      |
| 22 | Cyclohexanol, 4-(1-methylethyl)-                                | CA2/CA1/CA4/TRPM8/AR/NR1I3/GPBAR1/SHH/UGT2B7/SHBG/ESR1/ESR2/CDC25A/NPC1L1/CDC25B/HSD11B1/<br>SIGMAR1/DRD2/NR1H4/NR1H3/NR3C1/NR3C2/PGR/G6PD/GABBR1                                                                                                                                                |
| 23 | (1S,3R,5S)-6,6-dimethyl-2-methylidenebicyclo[3.1.1]heptan-3-ol  | UGT2B7/CA2/CA1/CA4/NR1H3/PTGS1/TRPM8/DRD2/HSD11B1/PTPN1/NR1I3                                                                                                                                                                                                                                    |
| 24 | 4-(1-methylethyl)-2-Cyclohexen-1-one                            | NR3C2/NR3C1/PGR/SERPINA6/SHBG/NR1I2/CYP17A1/HSD17B3/FABP1/NR1I3/SRD5A1/SRD5A2/SIGMAR1/CYP1<br>9A1/ADH1A/AR/FAAH/TRPV1/NPC1L1/PTGES/CCR5/ADORA3/MAPK3/PRKCH/HSD11B2/CDC25A/PTPN11/AK<br>R1B10/PTGS1/BCHE/PTPN2/BACE1/CTSD/ESR1/ESR2/SLC6A3/TRPA1/ADH1B/ADH1C/RORA/FNTA/CES1/CHRN<br>A4/CHRN2/FNTB |
| 25 | Cyclohexanemethanol, $\alpha$ , $\alpha$ -dimethyl-4-methylene- | CA2/CA1/CA4/PTGS1/TRPM8/HSD11B1/UGT2B7/NR1H3/DRD2/AR/NR1I3/SAE1/AKR1B10/CYP19A1/TRPV3/HM<br>OX1/HSD17B2/SLC6A4/ADRA2C/UBA2                                                                                                                                                                       |

|    |                                                                              |                                                                                                                                                                                                                                                                                                                      |
|----|------------------------------------------------------------------------------|----------------------------------------------------------------------------------------------------------------------------------------------------------------------------------------------------------------------------------------------------------------------------------------------------------------------|
| 26 | Verbenol                                                                     | AR/CA2/CA1/CA4/RORC/NPC1L1/RORA/TRPM8/SQLE/SHBG/NR1H3/PTPN1/POLB/NR1I3/SREBF2/CYP19A1/DRD2/BCHE/CHRM2/SLC6A4/NR3C1/ACHE/SRD5A2/PPARG/PPARA/PPARD/LTB4R                                                                                                                                                               |
| 27 | 4a,8-Dimethyl-2-(prop-1-en-2-yl)-1,2,3,4,4a,5,6,7-octahydronaphthalene       | PPARA/CNR2/NR1H3/AR/CYP19A1/ESR1/CHRM2/ACHE/SLC6A2/SLC6A4/CYP2C19/BCHE/ESR2/PTPN1/NR1I3                                                                                                                                                                                                                              |
| 28 | $\alpha$ -Terpineol                                                          | AR/CYP19A1/CA2/CA1/CA4/TRPM8/CHRM2/SLC6A4/NR1H3/PTPN1/NR1I3/SREBF2/NPC1L1/BCHE/ESR1/SQLE/ACHE/CYP51A1/SLC6A2/DRD2/CYP17A1/ESR2/CYP2C19/R3C2/PTPRF/PTPN2/PLA2G1B/ACP1/AKR1B10/SIGMAR1/NR3C1/TRPV3/ATP12A/PTPN6/SHBG/FABP4/PPARA/FABP3/FABP5/PPARD/FABP1/RORA/HMOX1/HMGCR/CD81/PGR/G6PD/SCD/ADRA2C/HSD11B1/SLC6A3      |
| 29 | (3R,5aR,9S,9aS)-2,2,5a,9-Tetramethyloctahydro-2H-3,9a-methanobenzo[b]oxepine | CYP19A1/SHH/CYP51A1/ACHE                                                                                                                                                                                                                                                                                             |
| 30 | 1-Cyclohexene-1-carboxaldehyde, 4-(1-methylethyl)-                           | SRD5A1/SERPINA6/SHBG/NR1I2/HSD17B3/FABP1/SRD5A2/CYP19A1/TRPV1/TRPA1/SIGMAR1/CCR5/ADH1A/PGR/AR/NR1I3/NPC1L1/PTGES/ADH4/ADH1B/ADH1C/NR3C2/CYP17A1/ADORA3/MAPK3/PRKCH/HSD11B2/CD C25A/PTPN11/AKR1B10/NR3C1/BCHE/BACE1/CTSD/SLC6A3/PTPN6/FAAH/RORA/FNTA/CNR1/PPARA/TERT/FABP5/PPARD/FDFT1/SLC5A7/ALDH1A1/CES1/PTPN1/FNTB |
| 31 | $\beta$ -cadinene                                                            | PPARA/CNR2/NR1H3/CYP19A1                                                                                                                                                                                                                                                                                             |
| 32 | Cuminaldehyde                                                                | ADH1A/ADH4/ADH1B/ADH1C/TYR/CES1/CES2/ALDH1A1/GSK3B/SRD5A1                                                                                                                                                                                                                                                            |
| 33 | Myrtenol                                                                     | SHBG/TRPM8/CYP19A1/SQLE/CHRM2/NR1H3/POLB/DRD2/SREBF2/SLC6A4/LTB4R/PTPN6/PTPN2/SPHK2/SPHK1/AR/CA2/CA1/CA4/RORC/NPC1L1/RORA/PTPN1/NR1I3                                                                                                                                                                                |
| 34 | 2H-3,9a-Methano-1-benzoxepin, octahydro-2,2,5a,9-tetramethyl-                | CYP19A1/SHH/CYP51A1/ACHE                                                                                                                                                                                                                                                                                             |
| 35 | 2-Cyclohexen-1-ol, 2-methyl-5-(1-methylethenyl)-                             | AR/CA2/CA1/CA4/SQLE/NR1H3/DRD2/TRPM8/NPC1L1/RORA/CYP19A1/TRPV3/HMOX1/SHBG/ADRA2C/HSD17B2/CHRM2/NR3C1/PTAFR/SCN5A/SCN9A/TOPI                                                                                                                                                                                          |
| 36 | 2-(4-Methylphenyl)propan-2-ol                                                | TRPM8/HMOX1/TRPV3/NR3C2/NR3C1/PGR/SLC6A3/OPRK1/CA2/SRD5A2/PTAFR/KCNA5/JAK1/JAK2/HSD17B2/CA4/CYP51A1                                                                                                                                                                                                                  |
| 37 | 4-Epicubebol                                                                 | UGT2B7/HSD11B1/SHBG/NR1I3/AR/CDC25A/CDC25B/ESR1/POLA1/GPBAR1/SHH/ESR2/NR1H3/TRPM8/CA2/CA                                                                                                                                                                                                                             |

|    |                                                                                        |                                                                                                                                                                                                                                                                                                                                        |
|----|----------------------------------------------------------------------------------------|----------------------------------------------------------------------------------------------------------------------------------------------------------------------------------------------------------------------------------------------------------------------------------------------------------------------------------------|
|    |                                                                                        | 1/NPC1L1/CA4/IDO1/CYP19A1/NR1H4/CYP17A1/SERPINA6/HSD17B3                                                                                                                                                                                                                                                                               |
| 38 | $\alpha$ -Calacorene                                                                   | NR1H4/NR1I2                                                                                                                                                                                                                                                                                                                            |
| 39 | Cubebol                                                                                | UGT2B7/HSD11B1/AR/SHBG/NR1I3/POLA1/SHH/ESR1/ESR2/CDC25A/CDC25B/TRPM8/NR1H3/CA2/CA1/CA4/NPC1L1/GPBAR1/NR1H4/CYP19A1/IDO1/CYP17A1                                                                                                                                                                                                        |
| 40 | Caryophyllene oxide                                                                    | SQLE/LSS/SLC6A4/SLC6A3                                                                                                                                                                                                                                                                                                                 |
| 41 | 1,3-Cyclohexadiene-1-methanol, 4-(1-methylethyl)-                                      | PPARG/VDR/RBP4/CYP11B1/CYP11B2/JAK1/JAK2/GLRA1                                                                                                                                                                                                                                                                                         |
| 42 | 1,5,5,8-Tetramethyl- 12- oxabicyclo[9.1.0]dodeca-3,7-diene                             | SQLE/AR/LSS/NR1H3/NR1H2/POLB/NPC1L1/KCNH2/NLRP3/POLA1/NR3C2/NR3C1/PGR/SERPINA6/SHBG/NR1I2/FABP1/NR1I3/SRD5A1/CYP19A1/SRD5A2/FAAH/TRPV1/CYP17A1/ADH1A/SIGMAR1/PTGES/HSD17B3/ADORA3/MAPK3/PRKCH/HSD11B2/CDC25A/PTPN11/AKR1B10/PTGS1/BCHE/PTPN2/BACE1/CTSD/ESR1/ESR2/TRPA1/ADH1B/ADH1C/HSD11B1/RORA/PTPN6/FNTA/FDFT1/DRD2/DRD4/PARP1/FNTB |
| 43 | 1,4-Cyclohexadiene-1-methanol, 4-(1-methylethyl)-                                      | SIGMAR1/DRD2/CYP11B1/PTGS2/CYP11B2/SQLE                                                                                                                                                                                                                                                                                                |
| 44 | Cyclohexanemethanol, 4-ethenyl- $\alpha,\alpha,4$ -trimethyl-3- (1-methylethenyl)-     | UGT2B7/HSD11B1/PTGS1/NR1H3/CYP19A1/SLC6A4/AR/CYP17A1/NR3C2/BCHE/SLC10A2/SAE1/AKR1B10/NR1I3/GCGR/ICMT/PSEN2/CNR2/PER2/SLC18A3/HSD17B2/HMGCR/PABPC1/ABHD6/UBA2/PSENEN/NCSTN/PSEN1/APH1B/APH1A                                                                                                                                            |
| 45 | Guaiol                                                                                 | NR1I3/CYP19A1/PTPN1/SLC6A4/AR/ESR1/CHRM2/ACHE/SLC6A2/CYP2C19/NR1H3/SQLE/CYP17A1/CES2/BCHE/UGT2B7/HSD11B1/SREBF2/NPC1L1/FABP4/PPARA/TERT/FABP3/FABP5/PPARD/FABP1/CYP51A1/SHBG/HMGCR/POLB/PDE4D/PTPRF/PTPN2/PLA2G1B/ACP1/SCD/AKR1B10/CDC25B                                                                                              |
| 46 | Rosifoliol                                                                             | HMGCR/SHBG/ESR2/SLC6A4/CHRM2/ACHE/SLC6A2/CYP2C19/NR1I3/RORA/BCHE/UGT2B7/G6PD/PTPN1/SERPINA6/PTPN6/PTPN2/SQLE/HSD11B1/CES2/PREP/IDO1/PTGER2/TBXAS1/FABP4/PPARG/PPARA/TERT/FABP3/FABP5/PPARD/FABP1/NR3C1/PABPC1/POLB/PDE4D/PTPRF/PLA2G1B/ACP1/AKR1B10/CYP19A1/NR1H3/CYP17A1/RORC/SREBF2/NPC1L1/CYP51A1/AR/ESR1                           |
| 47 | 2-Naphthalenemethanol, 1,2,3,4,4a,5,6,7-octahydro- $\alpha,\alpha, 4a,8$ -tetramethyl- | CYP19A1/PTPN1/AR/ESR1/CHRM2/ACHE/SLC6A2/SLC6A4/CYP2C19/NR1I3/NR1H3/CYP17A1/RORC/SREBF2/NPC1L1/CYP51A1/HSD11B1/HMGCR/POLB/PDE4D/PTPRF/PTPN2/PLA2G1B/ACP1/AKR1B10/BCHE/UGT2B7/CDC25                                                                                                                                                      |

|    |                                                                                                                  |                                                                                                                                                                                                                                                                                                                                                                                                                               |
|----|------------------------------------------------------------------------------------------------------------------|-------------------------------------------------------------------------------------------------------------------------------------------------------------------------------------------------------------------------------------------------------------------------------------------------------------------------------------------------------------------------------------------------------------------------------|
|    |                                                                                                                  | B/PTPN6/SQLE/SHBG/ESR2/CD81/CES2/PREP/ATP12A/FNTA/FABP4/PPARG/PPARA/TERT/FABP3/FABP5/PPAR<br>D/FABP1/RORA/HSD11B2/G6PD/SCD/LTB4R/PTGS2/FNTB                                                                                                                                                                                                                                                                                   |
| 48 | 1 <i>H</i> -Cycloprop[e]azulen-7-ol, decahydro-1, 1,7-<br>trimethyl- 4-methylene-, [1ar-<br>(1α,4α,7β,7aβ,7bα)]- | UGT2B7/HSD11B1/IDO1/PTGS1/NR1H3/PGR/SLC6A3/ICMT                                                                                                                                                                                                                                                                                                                                                                               |
| 49 | 4a,8-Dimethyl-4,4a,5,6,7,8-hexahydronaphthalen-<br>2(3 <i>H</i> )-one                                            | SRD5A1/SRD5A2/NR3C2/NR3C1/PGR/SERPINA6/SHBG/NR1I2/HSD17B3/FABP1/NR1I3/SIGMAR1/CYP19A1/AR/C<br>YP17A1/NPC1L1/PTGES/TRPA1/CCR5/ADORA3/MAPK3/PRKCH/HSD11B2/CDC25A/PTPN11/AKR1B10/PTGS1/B<br>CHE/PTPN2/BACE1/FAAH/TRPV1/CTSD/ESR1/ESR2/HSD11B1/SLC6A3/RORA/ADH1A/FNTA/FNTB/CES1/NOS2/<br>ALOX5/CES2/PTPN6/PTPN1/FDFT1/ADH1C/TYMS/DRD4                                                                                             |
| 50 | 1,7-di-iso-propylnaphthalene                                                                                     | CYP2A6/MGLL/CXCR3/TAAR1                                                                                                                                                                                                                                                                                                                                                                                                       |
| 51 | 1,3-di-iso-propylnaphthalene                                                                                     | HTR2B/GABRB3/GABRA1/GABRB2/GABRG2/SLC6A2                                                                                                                                                                                                                                                                                                                                                                                      |
| 52 | 5-Azulenemethanol, 1,2,3,3a,4,5,6,7-octahydro-<br>α,α, 3,8-tetramethyl-                                          | CYP19A1/AR/ESR1/CHRM2/ACHE/SLC6A2/SLC6A4/CYP2C19/CYP17A1/NR1H3/NR1I3/RORC/SREBF2/NPC1L1/C<br>YP51A1/HMGCR/SHBG/SQLE/BCHE/UGT2B7/ESR2/PTPN1/FABP4/PPARG/PPARA/TERT/FABP3/FABP5/PPARD/<br>FABP1/RORA/HSD11B1/SCD/G6PD/SERPINA6/CES2/TOP1/PTGER2/ATP12A/PTPN6/PTPN2/CNR1/IDO1/GCGR/<br>GRM5                                                                                                                                      |
| 53 | Agarospinol                                                                                                      | CYP19A1/SLC6A4/AR/ESR1/CHRM2/ACHE/SLC6A2/CYP2C19/CYP17A1/NR1H3/SREBF2/NPC1L1/CYP51A1/BCH<br>E/HMGCR/SHBG/ESR2/NR1I3/SQLE/UGT2B7/RORC/PTPN1/PTGES/RORA/G6PD/CES2/PTPN6/PTPN2/SERPINA6<br>/FABP4/PPARG/PPARA/TERT/FABP3/FABP5/PPARD/FABP1/SCD/HSD11B1/PREP/POLB/TOP1/PTGER2/ATP12A/<br>NR3C1/DHCR7/SLC6A3/ICMT/PTPN11/AKR1B10                                                                                                   |
| 54 | 1,4-di-iso-propylnaphthalene                                                                                     | CYP2A6/TAAR1                                                                                                                                                                                                                                                                                                                                                                                                                  |
| 55 | <i>n</i> -Decanoic acid                                                                                          | FABP4/FABP5/FABP3/FFAR1/SLC22A6/HSD11B1/PPARA/AKR1B10/VDR/NR1H4/POLB/GPBAR1/AR/FABP2/PHF8<br>/CYP19A1/PPARD/SERPINA6/SHBG/HSD17B3/G6PD/GABBR1/PTGER2/NPC1L1/CDC25A/CXCL8/HSD11B2/UGT2<br>B7/CA2/CA1/KDM2A/KDM5C/HAO1/PLG/GSTK1/SRD5A1/SLC22A12/PTGDR2/CDC45/DUSP3/PTGDR/PTGFR/A<br>KR1B1/TTR/AKR1C3/TBXA2R/GABRA2/PTPN1/BCAT2/FNTA/CACNA2D1/PTGS2/PDPK1/CHRNA7/RARA/IMP<br>D/H2/THRA/THRB/FABP1/GRM5/PTGS1/GABRB2/GABRG2/FNTB |

|    |                         |                                                                                                                                                                                                                                                                                                                                                                                                                                                                                                                                                                                                                                                                                                                       |
|----|-------------------------|-----------------------------------------------------------------------------------------------------------------------------------------------------------------------------------------------------------------------------------------------------------------------------------------------------------------------------------------------------------------------------------------------------------------------------------------------------------------------------------------------------------------------------------------------------------------------------------------------------------------------------------------------------------------------------------------------------------------------|
| 56 | 2,4-Di-tert-butylphenol | CA2/PTGS1/HTR2B/HTR2C/GABRA1/SLC6A2/GABRB3/GABBR2/TNNC1/ESR2/HTR6/ESRRG/RORC/ESR1/AR/TRPA1/MC4R/TYR/ALOX5/AKT1/NOS1/NOS3/GABRG2/GABRB2/GABBR1/TNNT2/TNNI3<br>FFAR1/PPARA/FABP4/FABP5/PPARD/FABP3/HSD11B1/SLC22A6/AKR1B10/FABP2/VDR/AR/PTGER2/UGT2B7/PHF8/SERPINA6/SHBG/HSD17B3/G6PD/GABBR1/CDC25A/NR1H4/CYP19A1/NPC1L1/GPBAR1/KDM5C/FNTA/KDM2A/PTPN1/POLB/PTGFR/CA2/CA1/HAO1/GSTK1/LTA4H/HSD11B2/FFAR4/PLG/PTGDR2/GABRA2/CDC45/PTGER4/PTGER3/AKR1B1/CYP1A2/MAPK1/TTR/TBXA2R/RXRA/HMGCR/IMPDH2/SLC22A12/CA12/PTPRC/CACNA2D1/RBP4/EDNRA/RARA/THRA/THRB/PTGDR/SLC16A1/AKR1C3/CHRNA7/TRPA1/RARG/RARB/CXCL8/SLC6A4/MMP13/MMP9/MMP2/MMP14/MMP12/PTGES/CMA1/CTSG/AKR1A1/SAE1/GRM5/FABP1/STS/GSR/BMP1/GABRB2/GABRG2/FNTB/UBA2 |
| 57 | Dodecanoic acid         |                                                                                                                                                                                                                                                                                                                                                                                                                                                                                                                                                                                                                                                                                                                       |

---

Table S2. Disease-target gene database

| NO. | Gene     | NO. | Gene   | NO. | Gene   | NO. | Gene    | NO. | Gene       | NO. | Gene   | NO. | Gene   | NO. | Gene    | NO. | Gene     | NO. | Gene    |
|-----|----------|-----|--------|-----|--------|-----|---------|-----|------------|-----|--------|-----|--------|-----|---------|-----|----------|-----|---------|
| 1   | ABCA1    | 2   | ABCA3  | 3   | ABCA4  | 4   | ABCA7   | 5   | ABCB1      | 6   | ABCB11 | 7   | ABCB4  | 8   | ABCC6   | 9   | ABCC8    | 10  | ABCC9   |
| 11  | ABCD1    | 12  | ABCG5  | 13  | ABCG8  | 14  | ABHD5   | 15  | ABL1       | 16  | ABO    | 17  | ACE    | 18  | ACE2    | 19  | ACHE     | 20  | ACTA1   |
| 21  | ACTA2    | 22  | ACTC1  | 23  | ACTN2  | 24  | ACVRL1  | 25  | ADA        | 26  | ADA2   | 27  | ADAM10 | 28  | ADAM17  | 29  | ADAMTS13 | 30  | ADAMTS7 |
| 31  | ADD1     | 32  | ADH1C  | 33  | ADIPOQ | 34  | ADM     | 35  | ADORA2A    | 36  | ADRA2C | 37  | ADRB1  | 38  | ADRB2   | 39  | ADTRP    | 40  | AFG3L2  |
| 41  | AGER     | 42  | AGL    | 43  | AGT    | 44  | AGTR1   | 45  | AGTR2      | 46  | AIFM1  | 47  | AKAP13 | 48  | AKT1    | 49  | ALB      | 50  | ALDH1A2 |
| 51  | ALDH2    | 52  | ALMS1  | 53  | ALOX5  | 54  | ALOX5AP | 55  | AMPD1      | 56  | ANGPT1 | 57  | ANGPT2 | 58  | ANGPTL4 | 59  | ANK2     | 60  | ANKRD1  |
| 61  | ANKS1A   | 62  | ANO5   | 63  | ANXA5  | 64  | APBB1   | 65  | APC        | 66  | APCS   | 67  | APLN   | 68  | APOA1   | 69  | APOA1-AS | 70  | APOA2   |
| 71  | APOA4    | 72  | APOA5  | 73  | APOB   | 74  | APOC1   | 75  | APOC3      | 76  | APOE   | 77  | APOH   | 78  | APOL1   | 79  | APP      | 80  | AR      |
| 81  | ARHGEF26 | 82  | ARL15  | 83  | ARNTL  | 84  | ARPC1B  | 85  | ARSA       | 86  | ARSB   | 87  | AS3MT  | 88  | ASAH1   | 89  | ASPA     | 90  | ATG16L1 |
| 91  | ATM      | 92  | ATP1A1 | 93  | ATP2A2 | 94  | ATP2B1  | 95  | ATP2C1     | 96  | ATP7A  | 97  | ATXN2  | 98  | ATXN3   | 99  | AVP      | 100 | B2M     |
| 101 | BAG3     | 102 | BAZ1B  | 103 | BBS1   | 104 | BBS2    | 105 | BCHE       | 106 | BCKDHB | 107 | BCL2   | 108 | BCS1L   | 109 | BDNF     | 110 | BGLAP   |
| 111 | BGN      | 112 | BLK    | 113 | BMP2   | 114 | BMP4    | 115 | BMP6       | 116 | BMPR1A | 117 | BMPR2  | 118 | BRAF    | 119 | BRAP     | 120 | BRCA1   |
| 121 | BRCA2    | 122 | BRF1   | 123 | BSCL2  | 124 | BSND    | 125 | BTNL2      | 126 | C3     | 127 | C4A    | 128 | C9orf72 | 129 | CACNA1A  | 130 | CACNA1C |
| 131 | CACNB2   | 132 | CADM3  | 133 | CALCA  | 134 | CALR    | 135 | CARD9      | 136 | CARMAL | 137 | CASP1  | 138 | CASP3   | 139 | CASP8    | 140 | CASQ2   |
| 141 | CASR     | 142 | CAT    | 143 | CAV1   | 144 | CAV3    | 145 | CBL        | 146 | CBS    | 147 | CCDC65 | 148 | CCDC92  | 149 | CCL11    | 150 | CCL2    |
| 151 | CCL3     | 152 | CCL5   | 153 | CCN2   | 154 | CCND1   | 155 | CCR1       | 156 | CCR5   | 157 | CD14   | 158 | CD28    | 159 | CD34     | 160 | CD36    |
| 161 | CD4      | 162 | CD40   | 163 | CD40LG | 164 | CD8A    | 165 | CDH1       | 166 | CDH13  | 167 | CDH2   | 168 | CDH23   | 169 | CDK13    | 170 | CDK8    |
| 171 | CDKN1A   | 172 | CDKN1C | 173 | CDKN2A | 174 | CDKN2B  | 175 | CDKN2B-AS1 | 176 | CELA2A | 177 | CELSR2 | 178 | CEP290  | 179 | CERS1    | 180 | CETP    |
| 181 | CFC1     | 182 | CFDP1  | 183 | CFH    | 184 | CFTR    | 185 | CHAT       | 186 | CHCHD2 | 187 | CHD7   | 188 | CHDS1   | 189 | CHDS2    | 190 | CHDS3   |

|     |         |     |         |     |         |     |        |     |         |     |         |     |          |     |          |     |        |     |         |
|-----|---------|-----|---------|-----|---------|-----|--------|-----|---------|-----|---------|-----|----------|-----|----------|-----|--------|-----|---------|
| 191 | CHDS4   | 192 | CHDS8   | 193 | CHDS9   | 194 | CHGA   | 195 | CIITA   | 196 | CITED2  | 197 | CKM      | 198 | CLCN1    | 199 | CLCN5  | 200 | CLN3    |
| 201 | CLU     | 202 | CMA1    | 203 | CNNM2   | 204 | COG2   | 205 | COL17A1 | 206 | COL1A1  | 207 | COL1A2   | 208 | COL2A1   | 209 | COL3A1 | 210 | COL4A1  |
| 211 | COL4A2  | 212 | COL4A3  | 213 | COL4A4  | 214 | COL7A1 | 215 | COMT    | 216 | COPA    | 217 | CORIN    | 218 | COX10    | 219 | CP     | 220 | CPT2    |
| 221 | CRB2    | 222 | CRELD1  | 223 | CRP     | 224 | CRYAA  | 225 | CRYAB   | 226 | CSF2    | 227 | CSF3     | 228 | CSRP3    | 229 | CST3   | 230 | CTLA4   |
| 231 | CTNNB1  | 232 | CTSD    | 233 | CX3CR1  | 234 | CXCL12 | 235 | CXCL8   | 236 | CXCR4   | 237 | CYBA     | 238 | CYBB     | 239 | CYCS   | 240 | CYP11B2 |
| 241 | CYP17A1 | 242 | CYP27A1 | 243 | CYP2C19 | 244 | CYP2C9 | 245 | CYP2D6  | 246 | CYP3A4  | 247 | CYP7A1   | 248 | DAB2IP   | 249 | DBT    | 250 | DDAH2   |
| 251 | DES     | 252 | DHX16   | 253 | DMD     | 254 | DNAH11 | 255 | DNAH5   | 256 | DNAI1   | 257 | DNAJB11  | 258 | DNAJC6   | 259 | DNM2   | 260 | DNMT3A  |
| 261 | DOCK6   | 262 | DRD2    | 263 | DSC2    | 264 | DSG2   | 265 | DSP     | 266 | DTNA    | 267 | DYNC2H1  | 268 | DYNC2LI1 | 269 | DYRK1A | 270 | DZIP1L  |
| 271 | ECE1    | 272 | ECM1    | 273 | EDN1    | 274 | EDN3   | 275 | EDNRA   | 276 | EDNRB   | 277 | EGF      | 278 | EGFR     | 279 | EIF4G1 | 280 | ELANE   |
| 281 | ELN     | 282 | ELOVL4  | 283 | EMD     | 284 | ENG    | 285 | ENO2    | 286 | ENPP1   | 287 | EP300    | 288 | EPHB4    | 289 | EPHX2  | 290 | EPO     |
| 291 | ERBB2   | 292 | ERBB3   | 293 | ERBB4   | 294 | ERCC2  | 295 | ERCC6   | 296 | ESR1    | 297 | ESR2     | 298 | EVC2     | 299 | EYA4   | 300 | F10     |
| 301 | F11     | 302 | F12     | 303 | F13A1   | 304 | F2     | 305 | F3      | 306 | F5      | 307 | F7       | 308 | F8       | 309 | F9     | 310 | FABP3   |
| 311 | FADS1   | 312 | FADS2   | 313 | FARSB   | 314 | FAS    | 315 | FASLG   | 316 | FASTKD2 | 317 | FBLN5    | 318 | FBN1     | 319 | FBN2   | 320 | FCGR2A  |
| 321 | FCGR3B  | 322 | FGA     | 323 | FGB     | 324 | FGF2   | 325 | FGF23   | 326 | FGFR1   | 327 | FGFR2    | 328 | FHL1     | 329 | FIG4   | 330 | FKRP    |
| 331 | FKTN    | 332 | FLNA    | 333 | FLNC    | 334 | FLT1   | 335 | FLT4    | 336 | FN1     | 337 | FOS      | 338 | FOXC1    | 339 | FOXC2  | 340 | FOXD3   |
| 341 | FOXE3   | 342 | FOXP1   | 343 | FOXP3   | 344 | FTL    | 345 | FTO     | 346 | FURIN   | 347 | FUS      | 348 | FXN      | 349 | G6PC1  | 350 | G6PD    |
| 351 | GAA     | 352 | GALNS   | 353 | GALNT2  | 354 | GAPDH  | 355 | GARS1   | 356 | GATA1   | 357 | GATA3    | 358 | GATA4    | 359 | GATA5  | 360 | GATA6   |
| 361 | GATAD1  | 362 | GBA     | 363 | GBA1    | 364 | GBE1   | 365 | GCG     | 366 | GCK     | 367 | GCKR     | 368 | GCLC     | 369 | GDAP1  | 370 | GDF1    |
| 371 | GDF15   | 372 | GNDF    | 373 | GFAP    | 374 | GGT1   | 375 | GHR     | 376 | GHRL    | 377 | GIGYF2   | 378 | GIP      | 379 | GJA1   | 380 | GJA5    |
| 381 | GLA     | 382 | GLB1    | 383 | GLE1    | 384 | GNAS   | 385 | GNB3    | 386 | GNB4    | 387 | GNE      | 388 | GNPTAB   | 389 | GP1BA  | 390 | GP6     |
| 391 | GPT     | 392 | GRK2    | 393 | GRN     | 394 | GSN    | 395 | GSR     | 396 | GSTM1   | 397 | GTF2IRD1 | 398 | GUCY1A1  | 399 | GUSB   | 400 | GYG1    |



|     |        |     |          |     |        |     |        |     |        |     |         |     |           |     |                    |     |          |     |              |
|-----|--------|-----|----------|-----|--------|-----|--------|-----|--------|-----|---------|-----|-----------|-----|--------------------|-----|----------|-----|--------------|
| 401 | GYS1   | 402 | H19      | 403 | H2AC18 | 404 | HADHA  | 405 | HAMP   | 406 | HAND1   | 407 | HAND2     | 408 | HARS1              | 409 | HBA1     | 410 | HBA2         |
| 411 | HBB    | 412 | HCN4     | 413 | HDAC9  | 414 | HECTD4 | 415 | HEG1   | 416 | HEXB    | 417 | HEY2      | 418 | HFE                | 419 | HGF      | 420 | HGSNAT       |
| 421 | HHIPL1 | 422 | HIF1A    | 423 | HJV    | 424 | HLA-A  | 425 | HLA-B  | 426 | HLA-C   | 427 | HLA-DPB1  | 428 | HLA-DQA1           | 429 | HLA-DQB1 | 430 | HLA-DRB1     |
| 431 | HMGB1  | 432 | HMGCR    | 433 | HMOX1  | 434 | HNF1A  | 435 | HNF1B  | 436 | HNRNPA1 | 437 | HNRNPA2B1 | 438 | HNRNPUL2-<br>BSCL2 | 439 | HOXD10   | 440 | HP           |
| 441 | HRAS   | 442 | HSD17B10 | 443 | HSPA4  | 444 | HSPB1  | 445 | HSPB8  | 446 | HSPD1   | 447 | HSPG2     | 448 | HTR2A              | 449 | HTRA2    | 450 | HTT          |
| 451 | ICAM1  | 452 | IDS      | 453 | IDUA   | 454 | IFIH1  | 455 | IFNA1  | 456 | IFNG    | 457 | IFNGR1    | 458 | IFT140             | 459 | IFT172   | 460 | IGF1         |
| 461 | IGF1R  | 462 | IGF2     | 463 | IGF2R  | 464 | IGFBP3 | 465 | IKBKG  | 466 | IL10    | 467 | IL12A     | 468 | IL12B              | 469 | IL12RB1  | 470 | IL13         |
| 471 | IL17A  | 472 | IL18     | 473 | IL1A   | 474 | IL1B   | 475 | IL1R1  | 476 | IL1RN   | 477 | IL2       | 478 | IL23R              | 479 | IL2RA    | 480 | IL37         |
| 481 | IL4    | 482 | IL5      | 483 | IL6    | 484 | IL6R   | 485 | INAVA  | 486 | INF2    | 487 | INS       | 488 | INSR               | 489 | INVS     | 490 | IQCB1        |
| 491 | IRAK1  | 492 | IRF5     | 493 | IRGM   | 494 | IRS1   | 495 | ISL1   | 496 | ITGA1   | 497 | ITGA2     | 498 | ITGA2B             | 499 | ITGA3    | 500 | ITGAM        |
| 501 | ITGB2  | 502 | ITGB3    | 503 | JAG1   | 504 | JAK2   | 505 | JCAD   | 506 | JPH1    | 507 | JUN       | 508 | JUP                | 509 | KALRN    | 510 | KAT6B        |
| 511 | KCNA5  | 512 | KCND3    | 513 | KCNE1  | 514 | KCNE2  | 515 | KCNH2  | 516 | KCNJ11  | 517 | KCNJ13    | 518 | KCNJ2              | 519 | KCNJ5    | 520 | KCNJ8        |
| 521 | KCNK5  | 522 | KCNQ1    | 523 | KCTD10 | 524 | KDR    | 525 | KIF1B  | 526 | KIT     | 527 | KL        | 528 | KNG1               | 529 | KRAS     | 530 | KRT5         |
| 531 | LAMA2  | 532 | LAMP2    | 533 | LBR    | 534 | LCAT   | 535 | LCN2   | 536 | LDB3    | 537 | LDLR      | 538 | LDLRAP1            | 539 | LDLR-AS1 | 540 | LEP          |
| 541 | LEPR   | 542 | LGALS2   | 543 | LGALS3 | 544 | LIPA   | 545 | LIPC   | 546 | LITAF   | 547 | LMNA      | 548 | LMOD1              | 549 | LMX1B    | 550 | LOC106627981 |
| 551 | LOX    | 552 | LPA      | 553 | LPAL2  | 554 | LPL    | 555 | LRP1   | 556 | LRP2    | 557 | LRP5      | 558 | LRP6               | 559 | LRP8     | 560 | LRRC56       |
| 561 | LRSAM1 | 562 | LTA      | 563 | LTBP2  | 564 | LZTR1  | 565 | MACO1  | 566 | MAP2K1  | 567 | MAP2K2    | 568 | MAP3K7CL           | 569 | MAPK1    | 570 | MAPK14       |
| 571 | MAPT   | 572 | MARS1    | 573 | MB     | 574 | MBL2   | 575 | MC4R   | 576 | MECP2   | 577 | MED12     | 578 | MED13L             | 579 | MED25    | 580 | MEF2A        |
| 581 | MEF2C  | 582 | MEFV     | 583 | MEN1   | 584 | MFN2   | 585 | MGP    | 586 | MHRT    | 587 | MIA3      | 588 | MIAT               | 589 | MIF      | 590 | MIR106B      |
| 591 | MIR122 | 592 | MIR126   | 593 | MIR132 | 594 | MIR140 | 595 | MIR142 | 596 | MIR143  | 597 | MIR144    | 598 | MIR145             | 599 | MIR146A  | 600 | MIR146B      |

|     |           |     |         |     |         |     |         |     |         |     |        |     |          |     |          |     |         |     |           |
|-----|-----------|-----|---------|-----|---------|-----|---------|-----|---------|-----|--------|-----|----------|-----|----------|-----|---------|-----|-----------|
| 601 | MIR150    | 602 | MIR155  | 603 | MIR15A  | 604 | MIR17   | 605 | MIR17HG | 606 | MIR182 | 607 | MIR196A2 | 608 | MIR199A1 | 609 | MIR208A | 610 | MIR21     |
| 611 | MIR210    | 612 | MIR22   | 613 | MIR221  | 614 | MIR222  | 615 | MIR223  | 616 | MIR29A | 617 | MIR29B1  | 618 | MIR320A  | 619 | MIR328  | 620 | MIR34A    |
| 621 | MIR423    | 622 | MIR499A | 623 | MIR92B  | 624 | MKKS    | 625 | MLXIPL  | 626 | MMACHC | 627 | MME      | 628 | MMP1     | 629 | MMP12   | 630 | MMP13     |
| 631 | MMP2      | 632 | MMP3    | 633 | MMP8    | 634 | MMP9    | 635 | MORC2   | 636 | MPL    | 637 | MPO      | 638 | MPV17    | 639 | MPZ     | 640 | MRAS      |
| 641 | MRPS6     | 642 | MRTFA   | 643 | MT-ATP6 | 644 | MT-CO1  | 645 | MT-CO2  | 646 | MT-CO3 | 647 | MT-CYB   | 648 | MTHFD1L  | 649 | MTHFR   | 650 | MT-ND1    |
| 651 | MT-ND2    | 652 | MT-ND3  | 653 | MT-ND4  | 654 | MT-ND5  | 655 | MT-ND6  | 656 | MTOR   | 657 | MTR      | 658 | MTRR     | 659 | MT-TK   | 660 | MT-TL1    |
| 661 | MTTP      | 662 | MT-TS1  | 663 | MUC1    | 664 | MYBPC3  | 665 | MYC     | 666 | MYD88  | 667 | MYH11    | 668 | MYH6     | 669 | MYH7    | 670 | MYH9      |
| 671 | MYL2      | 672 | MYL3    | 673 | MYLK    | 674 | MYOCD   | 675 | MYOT    | 676 | MYPN   | 677 | MYRF     | 678 | NAGA     | 679 | NAGLU   | 680 | NAMPT     |
| 681 | NAT2      | 682 | NCF1    | 683 | NCF2    | 684 | NCF4    | 685 | NDP     | 686 | NDRG1  | 687 | NDUFAF6  | 688 | NDUFS4   | 689 | NDUFV1  | 690 | NEB       |
| 691 | NEFL      | 692 | NEU1    | 693 | NEXN    | 694 | NF1     | 695 | NFE2L2  | 696 | NFKB1  | 697 | NGF      | 698 | NHLRC1   | 699 | NIPBL   | 700 | NIPSNAP3B |
| 701 | NKX2-5    | 702 | NKX2-6  | 703 | NLRP3   | 704 | NOD2    | 705 | NODAL   | 706 | NOS1   | 707 | NOS2     | 708 | NOS3     | 709 | NOTCH1  | 710 | NOTCH2    |
| 711 | NOTCH2NLC | 712 | NOTCH3  | 713 | NPC1    | 714 | NPC1L1  | 715 | NPC2    | 716 | NPPA   | 717 | NPPB     | 718 | NPPC     | 719 | NPY     | 720 | NR1H3     |
| 721 | NR1H4     | 722 | NR2F2   | 723 | NR3C1   | 724 | NR3C2   | 725 | NR4A2   | 726 | NRAS   | 727 | NRG1     | 728 | NSD1     | 729 | NTRK1   | 730 | OFD1      |
| 731 | OLR1      | 732 | OPA1    | 733 | OPTN    | 734 | OXTR    | 735 | P2RY12  | 736 | PAH    | 737 | PAPPA    | 738 | PARK7    | 739 | PAX2    | 740 | PAX6      |
| 741 | PCSK9     | 742 | PDCD1   | 743 | PDE11A  | 744 | PDE5A   | 745 | PDE8B   | 746 | PDGFB  | 747 | PDGFD    | 748 | PDGFRA   | 749 | PDGFRB  | 750 | PECAM1    |
| 751 | PEX1      | 752 | PEX2    | 753 | PEX5    | 754 | PEX6    | 755 | PEX7    | 756 | PF4    | 757 | PGAM2    | 758 | PGF      | 759 | PHACTR1 | 760 | PHKA2     |
| 761 | PHKG2     | 762 | PHOX2B  | 763 | PHYH    | 764 | PIGL    | 765 | PIK3C2A | 766 | PIK3CA | 767 | PINK1    | 768 | PITX2    | 769 | PKD1    | 770 | PKD1L1    |
| 771 | PKD2      | 772 | PKHD1   | 773 | PKP2    | 774 | PLA2G2A | 775 | PLA2G6  | 776 | PLA2G7 | 777 | PLAT     | 778 | PLAU     | 779 | PLEC    | 780 | PLEKHG5   |
| 781 | PLG       | 782 | PLN     | 783 | PLOD1   | 784 | PLPP3   | 785 | PLTP    | 786 | PLXND1 | 787 | PMM2     | 788 | PMP2     | 789 | PMS2    | 790 | PNPLA2    |
| 791 | POGLUT1   | 792 | POLG    | 793 | POMC    | 794 | POMGNT1 | 795 | PON1    | 796 | PON2   | 797 | PON3     | 798 | PPARA    | 799 | PPARG   | 800 | PPARGC1A  |
| 801 | PPBP      | 802 | PPM1K   | 803 | PPP1CB  | 804 | PRDM16  | 805 | PRF1    | 806 | PRKACA | 807 | PRKAG2   | 808 | PRKAR1A  | 809 | PRKCE   | 810 | PRKCQ     |

|      |         |      |         |      |         |      |         |      |          |      |           |      |           |      |          |      |          |      |                    |
|------|---------|------|---------|------|---------|------|---------|------|----------|------|-----------|------|-----------|------|----------|------|----------|------|--------------------|
| 811  | PRKCSH  | 812  | PRKG1   | 813  | PRKN    | 814  | PROCR   | 815  | PRODH    | 816  | PROM1     | 817  | PRPS1     | 818  | PSAP     | 819  | PSEN1    | 820  | PSEN2              |
| 821  | PSMA6   | 822  | PTCH1   | 823  | PTEN    | 824  | PTGS1   | 825  | PTGS2    | 826  | PTH       | 827  | PTPN11    | 828  | PTPN22   | 829  | PTPRC    | 830  | PTX3               |
| 831  | PYGL    | 832  | PYGM    | 833  | RAB7A   | 834  | RAF1    | 835  | RBCK1    | 836  | RBM20     | 837  | RBP4      | 838  | REN      | 839  | RERE     | 840  | RETN               |
| 841  | RHCE    | 842  | RHD     | 843  | RHO     | 844  | RHOA    | 845  | RIPK1    | 846  | RIT1      | 847  | RNF213    | 848  | RPGR     | 849  | RPGRIP1L | 850  | RPL36A-<br>HNRNPH2 |
| 851  | RRM2B   | 852  | RUNX1   | 853  | RUNX2   | 854  | RYR1    | 855  | RYR2     | 856  | S100B     | 857  | SAA1      | 858  | SAG      | 859  | SAR1B    | 860  | SBF2               |
| 861  | SCARB1  | 862  | SCN10A  | 863  | SCN5A   | 864  | SCNN1A  | 865  | SCO2     | 866  | SDHA      | 867  | SDHB      | 868  | SDHD     | 869  | SEC61A1  | 870  | SEC63              |
| 871  | SELE    | 872  | SELENON | 873  | SELL    | 874  | SELP    | 875  | SERPINA1 | 876  | SERPINA3  | 877  | SERPINC1  | 878  | SERPINE1 | 879  | SERPINF1 | 880  | SETBP1             |
| 881  | SFRP4   | 882  | SFTPC   | 883  | SGCB    | 884  | SGCD    | 885  | SGSH     | 886  | SH2B3     | 887  | SH2D1A    | 888  | SH3TC2   | 889  | SHH      | 890  | SHOC2              |
| 891  | SLC11A1 | 892  | SLC12A3 | 893  | SLC17A5 | 894  | SLC19A3 | 895  | SLC22A3  | 896  | SLC22A5   | 897  | SLC25A4   | 898  | SLC29A3  | 899  | SLC2A1   | 900  | SLC2A10            |
| 901  | SLC34A1 | 902  | SLC37A4 | 903  | SLC40A1 | 904  | SLC6A2  | 905  | SLC6A4   | 906  | SLC8A1    | 907  | SLURP1    | 908  | SMAD2    | 909  | SMAD3    | 910  | SMAD4              |
| 911  | SMAD6   | 912  | SMARCA4 | 913  | SMC1A   | 914  | SMPD1   | 915  | SNCA     | 916  | SOD1      | 917  | SOD2      | 918  | SOD3     | 919  | SORL1    | 920  | SORT1              |
| 921  | SOS1    | 922  | SOX9    | 923  | SP110   | 924  | SPP1    | 925  | SQSTM1   | 926  | SREBF1    | 927  | SST       | 928  | STAT1    | 929  | STAT3    | 930  | STAT4              |
| 931  | STN1    | 932  | STX1A   | 933  | SURF1   | 934  | SVEP1   | 935  | TAB2     | 936  | TAFAZZIN  | 937  | TARDBP    | 938  | TBK1     | 939  | TBL2     | 940  | TBP                |
| 941  | TBX1    | 942  | TBX18   | 943  | TBX2    | 944  | TBX20   | 945  | TBX4     | 946  | TBX5      | 947  | TCAP      | 948  | TCF21    | 949  | TCF7L2   | 950  | TEK                |
| 951  | TERC    | 952  | TERT    | 953  | TET2    | 954  | TF      | 955  | TG       | 956  | TGFB1     | 957  | TGFB2     | 958  | TGFB3    | 959  | TGFBR1   | 960  | TGFBR2             |
| 961  | TH      | 962  | THBD    | 963  | THBS1   | 964  | THSD7A  | 965  | TIMP1    | 966  | TKT       | 967  | TLL1      | 968  | TLR2     | 969  | TLR4     | 970  | TLR5               |
| 971  | TMEM216 | 972  | TMEM43  | 973  | TMEM67  | 974  | TNF     | 975  | TNFAIP3  | 976  | TNFRSF11A | 977  | TNFRSF11B | 978  | TNFRSF1A | 979  | TNFRSF1B | 980  | TNFSF11            |
| 981  | TNFSF4  | 982  | TNNC1   | 983  | TNNI3   | 984  | TNNI3K  | 985  | TNNT2    | 986  | TOMM40    | 987  | TP53      | 988  | TPM1     | 989  | TRAF6    | 990  | TRDN               |
| 991  | TRIB1   | 992  | TRIM2   | 993  | TRPM4   | 994  | TRPV4   | 995  | TSC1     | 996  | TSC2      | 997  | TSFM      | 998  | TSHR     | 999  | TTN      | 1000 | TTN-AS1            |
| 1001 | TTR     | 1002 | TWNK    | 1003 | TYMP    | 1004 | UBE2Z   | 1005 | UCHL1    | 1006 | UCP2      | 1007 | UGT1A1    | 1008 | UMOD     | 1009 | UTS2     | 1010 | VCAM1              |

---

|      |       |      |        |      |      |      |       |      |       |      |        |      |        |      |          |      |        |      |        |
|------|-------|------|--------|------|------|------|-------|------|-------|------|--------|------|--------|------|----------|------|--------|------|--------|
| 1011 | VCL   | 1012 | VCP    | 1013 | VDR  | 1014 | VEGFA | 1015 | VHL   | 1016 | VKORC1 | 1017 | VPS13C | 1018 | VWF      | 1019 | WDPCP  | 1020 | WDR12  |
| 1021 | WDR35 | 1022 | WFS1   | 1023 | WT1  | 1024 | XDH   | 1025 | XIAP  | 1026 | XK     | 1027 | XYLT1  | 1028 | XYLT2    | 1029 | YARS1  | 1030 | YY1AP1 |
| 1031 | ZAP70 | 1032 | ZC3HC1 | 1033 | ZEB2 | 1034 | ZFAT  | 1035 | ZFHX3 | 1036 | ZFPM2  | 1037 | ZIC3   | 1038 | ZMPSTE24 | 1039 | ZNF687 | 1040 | ZPR1   |

---

**Table S3. Target genes interacting with both chemicals and coronary heart disease**

| No. | Chemical constituents   | Disease-related targets                                                                                               |
|-----|-------------------------|-----------------------------------------------------------------------------------------------------------------------|
| 1   | $\beta$ -Pinene         | ESR1/AR/PPARA/CYP2C19/SLC6A4/PTGS1/SLC6A2/ACHE/NR1H3                                                                  |
| 2   | Sabinene                | ESR1/AR/PPARA/CYP2C19/SLC6A4/PTGS1/SLC6A2/NR1H4/ACHE/NR1H3                                                            |
| 3   | $\alpha$ -Phellandrene  | PPARA/ADORA2A                                                                                                         |
| 4   | $\beta$ -Myrcene        | PPARA                                                                                                                 |
| 5   | Terpinolene             | PPARA                                                                                                                 |
| 6   | 2,3-Dehydro-1,8-cineole | AR/HIF1A/NPC1L1/NR1H3                                                                                                 |
| 7   | Limonene                | PPARA/NR1H3                                                                                                           |
| 8   | Eucalyptol              | SHH/ACHE                                                                                                              |
| 9   | <i>p</i> -Cymene        | PPARA/PTGS1/ACHE                                                                                                      |
| 10  | 4-Carene                | ESR1/AR/PPARA/CYP2C19/SLC6A4/SLC6A2/ACHE                                                                              |
| 11  | 2-Nonanone              | TTR/MMP1/NOS2/JAK2/AR/FABP3/PTGS2/CYP2C19/SLC6A4/PTGS1/SLC6A2/ADH1C/EPHX2/ACHE/GSR/PTPRC/<br>ALOX5/MMP13/DRD2/CYP17A1 |
| 12  | Copaene                 | ESR1/AR/PPARA/CYP2C19/SLC6A4/SLC6A2/BCHE/ACHE                                                                         |
| 13  | 4-Thujanol              | ESR1/AR/NR3C2/G6PD/SHH/NR1H4/NR3C1/NPC1L1/ESR2/DRD2/NR1H3                                                             |
| 14  | Pinocarvone             | ACHE                                                                                                                  |
| 15  | Borneol acetate         | HMGCR/VDR/CYP11B2/ACHE                                                                                                |

|    |                                                                              |                                                                                                                        |
|----|------------------------------------------------------------------------------|------------------------------------------------------------------------------------------------------------------------|
| 16 | Caryophyllene                                                                | PPARA                                                                                                                  |
| 17 | Terpinen-4-ol                                                                | ESR1/HMGCR/AR/PPARA/NR3C2/G6PD/SLC6A4/SLC6A2/BCHE/ACHE/NR3C1/NPC1L1/ESR2/DRD2/ADRA2C/NR1H3/CYP17A1                     |
| 18 | Myrtenal                                                                     | ESR1/PTPN11/AR/CTSD/PTGS1/ADH1C/BCHE/NPC1L1/ESR2/DRD2/CYP17A1                                                          |
| 19 | Butanedioic acid, 2,3-bis(acetyloxy)-                                        | ABCB1                                                                                                                  |
| 20 | Cyclohexanol, 4-(1-methylethyl)-                                             | ESR1/AR/NR3C2/G6PD/SHH/NR1H4/NR3C1/NPC1L1/ESR2/DRD2/NR1H3                                                              |
| 21 | (1S,3R,5S)-6,6-dimethyl-2-methylidenebicyclo[3.1.1]heptan-3-ol               | PTGS1/DRD2/NR1H3                                                                                                       |
| 22 | 4-(1-methylethyl)-2-Cyclohexen-1-one                                         | ESR1/PTPN11/AR/CCR5/NR3C2/CTSD/PTGS1/ADH1C/BCHE/NR3C1/NPC1L1/ESR2/CYP17A1                                              |
| 23 | Cyclohexanemethanol, $\alpha$ , $\alpha$ - dimethyl-4-methylene-             | HMOX1/AR/SLC6A4/PTGS1/DRD2/ADRA2C/NR1H3                                                                                |
| 24 | Verbenol                                                                     | PPARG/AR/PPARA/SLC6A4/BCHE/ACHE/NR3C1/NPC1L1/DRD2/NR1H3                                                                |
| 25 | 4a,8-Dimethyl-2-(prop-1-en-2-yl)-1,2,3,4,4a,5,6,7-octahydronaphthalene       | ESR1/AR/PPARA/CYP2C19/SLC6A4/SLC6A2/BCHE/ACHE/ESR2/NR1H3                                                               |
| 26 | $\alpha$ -Terpineol                                                          | ESR1/HMOX1/HMGCR/AR/FABP3/PPARA/NR3C2/CYP2C19/G6PD/SLC6A4/SLC6A2/BCHE/ACHE/NR3C1/NPC1L1/ESR2/DRD2/ADRA2C/NR1H3/CYP17A1 |
| 27 | (3R,5aR,9S,9aS)-2,2,5a,9-Tetramethyloctahydro-2H-3,9a-methanobenzo[b]oxepine | SHH/ACHE                                                                                                               |
| 28 | 1-Cyclohexene-1-carboxaldehyde, 4-(1-methylethyl)-                           | PTPN11/AR/TERT/PPARA/CCR5/NR3C2/CTSD/ADH1C/BCHE/NR3C1/NPC1L1/CYP17A1                                                   |
| 29 | Cuminaldehyde                                                                | ADH1C                                                                                                                  |
| 30 | Myrtenol                                                                     | AR/SLC6A4/NPC1L1/DRD2/NR1H3                                                                                            |

|    |                                                                                            |                                                                                                               |
|----|--------------------------------------------------------------------------------------------|---------------------------------------------------------------------------------------------------------------|
| 31 | 2 <i>H</i> -3,9a-Methano-1-benzoxepin, octahydro-<br>2,2,5a,9-tetramethyl-                 | SHH/ACHE                                                                                                      |
| 32 | 2-Cyclohexen-1-ol, 2-methyl-5-(1-methylethenyl)-                                           | SCN5A/HMOX1/AR/NR3C1/NPC1L1/DRD2/ADRA2C/NR1H3                                                                 |
| 33 | 2-(4-Methylphenyl)propan-2-ol                                                              | HMOX1/JAK2/NR3C2/NR3C1/KCNA5                                                                                  |
| 34 | 4-Epicubebol                                                                               | ESR1/AR/SHH/NR1H4/NPC1L1/ESR2/NR1H3/CYP17A1/                                                                  |
| 35 | $\alpha$ -Calacorene                                                                       | NR1H4                                                                                                         |
| 36 | Cubebol                                                                                    | ESR1/AR/SHH/NR1H4/NPC1L1/ESR2/NR1H3/CYP17A1                                                                   |
| 37 | Caryophyllene oxide                                                                        | SLC6A4                                                                                                        |
| 38 | 1,3-Cyclohexadiene-1-methanol, 4-(1-methylethyl)-                                          | PPARG/JAK2/VDR/RBP4/CYP11B2                                                                                   |
| 39 | 1,5,5,8-Tetramethyl- 12- oxabicyclo[9.1.0]dodeca-<br>3,7-diene                             | ESR1/PTPN11/KCNH2/AR/NLRP3/NR3C2/CTSD/PTGS1/ADH1C/BCHE/NR3C1/NPC1L1/ESR2/DRD2/NR1H3/CYP<br>17A1               |
| 40 | 1,4-Cyclohexadiene-1-methanol, 4-(1-methylethyl)-                                          | PTGS2/CYP11B2/DRD2                                                                                            |
| 41 | Cyclohexanemethanol, 4-ethenyl- $\alpha,\alpha$ ,4-trimethyl-<br>3- (1-methylethenyl)-     | PSEN1/PSEN2/HMGCR/AR/NR3C2/SLC6A4/PTGS1/BCHE/NR1H3/CYP17A1                                                    |
| 42 | Guaiol                                                                                     | ESR1/HMGCR/AR/FABP3/TERT/PPARA/CYP2C19/SLC6A4/SLC6A2/BCHE/ACHE/NPC1L1/NR1H3/CYP17A1                           |
| 43 | Rosifoliol                                                                                 | PPARG/ESR1/HMGCR/AR/FABP3/TERT/PPARA/CYP2C19/G6PD/SLC6A4/SLC6A2/BCHE/ACHE/NR3C1/NPC1L1/<br>ESR2/NR1H3/CYP17A1 |
| 44 | 2-Naphthalenemethanol, 1,2,3,4,4a,5,6,7-<br>octahydro- $\alpha,\alpha$ , 4a,8-tetramethyl- | PPARG/ESR1/HMGCR/AR/FABP3/TERT/PPARA/PTGS2/CYP2C19/G6PD/SLC6A4/SLC6A2/BCHE/ACHE/NPC1L1/<br>ESR2/NR1H3/CYP17A1 |
| 45 | 1 <i>H</i> -Cycloprop[e]azulen-7-ol, decahydro-1, 1,7-<br>trimethyl- 4-methylene-, [1ar-   | PTGS1/NR1H3                                                                                                   |

(1 $\alpha$ ,4 $\alpha$ ,7 $\beta$ ,7 $\alpha$ )]-

|    |                                                                                              |                                                                                                                       |
|----|----------------------------------------------------------------------------------------------|-----------------------------------------------------------------------------------------------------------------------|
| 46 | (4a <i>S</i> ,8 <i>R</i> )-4a,8-Dimethyl-4,4a,5,6,7,8-hexahydronaphthalen-2(3 <i>H</i> )-one | ESR1/PTPN11/NOS2/AR/CCR5/NR3C2/CTSD/PTGS1/ADH1C/BCHE/NR3C1/NPC1L1/ESR2/ALOX5/CYP17A1                                  |
| 47 | 1,3-di-iso-propylnaphthalene                                                                 | SLC6A2                                                                                                                |
| 48 | 5-Azulenemethanol, 1,2,3,3a,4,5,6,7-octahydro- $\alpha,\alpha$ , 3,8-tetramethyl-            | PPARG/ESR1/HMGCR/AR/FABP3/TERT/PPARA/CYP2C19/G6PD/SLC6A4/SLC6A2/BCHE/ACHE/NPC1L1/ESR2/NR1H3/CYP17A1                   |
| 49 | Agarospinol                                                                                  | PPARG/ESR1/PTPN11/HMGCR/AR/FABP3/TERT/PPARA/CYP2C19/G6PD/SLC6A4/SLC6A2/BCHE/ACHE/NR3C1/NPC1L1/ESR2/NR1H3/CYP17A1      |
| 50 | <i>n</i> -Decanoic acid                                                                      | TTR/CXCL8/AR/FABP3/PPARA/PTGS2/PLG/G6PD/VDR/PTGS1/NR1H4/NPC1L1                                                        |
| 51 | 2,4-Di-tert-butylphenol                                                                      | NOS3/TNNT2/TNNI3/ESR1/AKT1/AR/PTGS1/SLC6A2/NOS1/MC4R/ESR2/TNNC1/ALOX5                                                 |
| 52 | Dodecanoic acid                                                                              | MAPK1/MMP9/TTR/CXCL8/MMP2/HMGCR/EDNRA/AR/FABP3/PPARA/PLG/G6PD/SLC6A4/VDR/RBP4/NR1H4/MMP12/GSR/NPC1L1/CMA1/PTPRC/MMP13 |

---



Table S4. The content of 10 ingredients in 20 batches of *Oleum Cinnamomi* (mg/g, n=3)

| Batch | $\beta$ -Pinene | Sabinene | Limonene | Eucalyptol | <i>p</i> -Cymene | Terpinen-4-ol | 4-(1-methylethyl)-2-Cyclohexen-1-one | $\alpha$ -Terpineol | Caryophyllene oxide | Guaiol |
|-------|-----------------|----------|----------|------------|------------------|---------------|--------------------------------------|---------------------|---------------------|--------|
| S1    | 27.60           | 32.80    | 5.14     | 165.35     | 65.13            | 8.45          | 1.12                                 | 49.97               | 38.99               | 9.82   |
| S2    | 33.79           | 43.47    | 6.36     | 189.73     | 73.22            | 7.33          | 1.02                                 | 51.08               | 36.38               | 9.38   |
| S3    | 38.68           | 48.19    | 6.91     | 221.28     | 87.35            | 7.83          | 2.13                                 | 48.77               | 34.41               | 4.86   |
| S4    | 45.66           | 58.12    | 7.21     | 207.34     | 88.71            | 7.87          | 0.91                                 | 49.01               | 31.60               | 8.43   |
| S5    | 48.96           | 61.68    | 6.90     | 193.10     | 85.42            | 5.67          | 0.69                                 | 39.31               | 34.28               | 8.50   |
| S6    | 47.66           | 57.34    | 6.31     | 201.58     | 80.66            | 6.13          | 0.69                                 | 40.90               | 32.89               | 8.27   |
| S7    | 46.35           | 59.67    | 7.03     | 215.96     | 83.70            | 4.44          | 0.79                                 | 41.14               | 36.74               | 6.38   |
| S8    | 43.20           | 55.25    | 6.20     | 198.06     | 84.90            | 5.30          | 1.21                                 | 36.60               | 35.70               | 5.07   |
| S9    | 47.54           | 62.96    | 6.76     | 196.00     | 84.37            | 5.31          | 0.69                                 | 39.68               | 35.41               | 7.72   |
| S10   | 10.28           | 3.04     | 2.98     | 65.69      | 15.29            | 6.17          | 4.72                                 | 21.21               | 11.51               | 1.75   |
| S11   | 13.89           | 3.19     | 2.75     | 67.24      | 18.01            | 7.43          | 4.85                                 | 23.20               | 11.84               | 1.79   |
| S12   | 20.21           | 14.13    | 6.67     | 103.04     | 17.69            | 7.87          | 3.81                                 | 28.08               | 16.83               | 3.49   |
| S13   | 10.46           | 2.20     | 5.62     | 88.26      | 17.96            | 6.38          | 4.36                                 | 14.01               | 13.67               | 0.54   |
| S14   | 10.22           | 2.51     | 8.75     | 112.70     | 18.06            | 7.80          | 4.22                                 | 16.91               | 12.75               | 0.49   |
| S15   | 9.39            | 2.19     | 8.70     | 111.71     | 16.81            | 8.27          | 3.95                                 | 16.79               | 12.96               | 0.51   |
| S16   | 8.89            | 3.73     | 4.07     | 63.90      | 16.15            | 7.58          | 3.14                                 | 17.73               | 20.72               | 5.16   |
| S17   | 11.08           | 2.22     | 6.77     | 117.40     | 21.7             | 10.04         | 5.52                                 | 18.96               | 14.94               | 0.44   |
| S18   | 8.69            | 1.81     | 7.80     | 108.67     | 16.54            | 8.19          | 4.72                                 | 18.11               | 14.87               | 0.54   |
| S19   | 13.29           | 2.51     | 11.73    | 114.17     | 21.60            | 10.47         | 5.04                                 | 19.61               | 11.74               | 0.81   |
| S20   | 8.93            | 1.90     | 6.85     | 104.13     | 17.01            | 7.96          | 4.95                                 | 16.78               | 14.92               | 0.49   |

**Table S5. Sample information of *Fructus Cinnamomi***

| Batch | Production Place          | Batch | Production Place       |
|-------|---------------------------|-------|------------------------|
| S1    | Luodian, Qiannan, Guizhou | S11   | Libo, Qiannan, Guizhou |
| S2    | Luodian, Qiannan, Guizhou | S12   | Baoshan, Yunnan        |
| S3    | Luodian, Qiannan, Guizhou | S13   | Pu'er, Yunnan          |
| S4    | Luodian, Qiannan, Guizhou | S14   | Jiangcheng, Yunnan     |
| S5    | Luodian, Qiannan, Guizhou | S15   | Mile, Yunnan           |
| S6    | Luodian, Qiannan, Guizhou | S16   | Lingyun, Guangxi       |
| S7    | Luodian, Qiannan, Guizhou | S17   | Leye, Guangxi          |
| S8    | Luodian, Qiannan, Guizhou | S18   | Pingguo, Guangxi       |
| S9    | Luodian, Qiannan, Guizhou | S19   | Tiandong, Guangxi      |
| S10   | Guanling, Anshun, Guizhou | S20   | Jingxi, Guangxi        |

**Table S6. Ion information of multi-index components in *Oleum Cinnamomi***

| Chemical composition                 | Target ion     | Reference ion  | Reference ion  |
|--------------------------------------|----------------|----------------|----------------|
|                                      | ( <i>m/z</i> ) | ( <i>m/z</i> ) | ( <i>m/z</i> ) |
| $\beta$ -pinene                      | 79             | 91             | 41             |
| Sabinene                             | 93             | 91             | 77             |
| Limonene                             | 68             | 93             | 67             |
| Eucalyptol                           | 71             | 80             | 108            |
| <i>p</i> -Cymene                     | 117            | 134            | 91             |
| Terpinen-4-ol                        | 71             | 93             | 111            |
| 4-(1-methylethyl)-2-cyclohexen-1-one | 96             | 95             | 67             |
| $\alpha$ -Terpineol                  | 121            | 93             | 59             |
| Caryophyllene oxide                  | 79             | 93             | 43             |
| Guaiol                               | 161            | 105            | 107            |
| Naphthalene (IS <sup>1</sup> )       | 128            | 127            | 102            |
| Cyclohexanone (IS <sup>2</sup> )     | 55             | 42             | 98             |

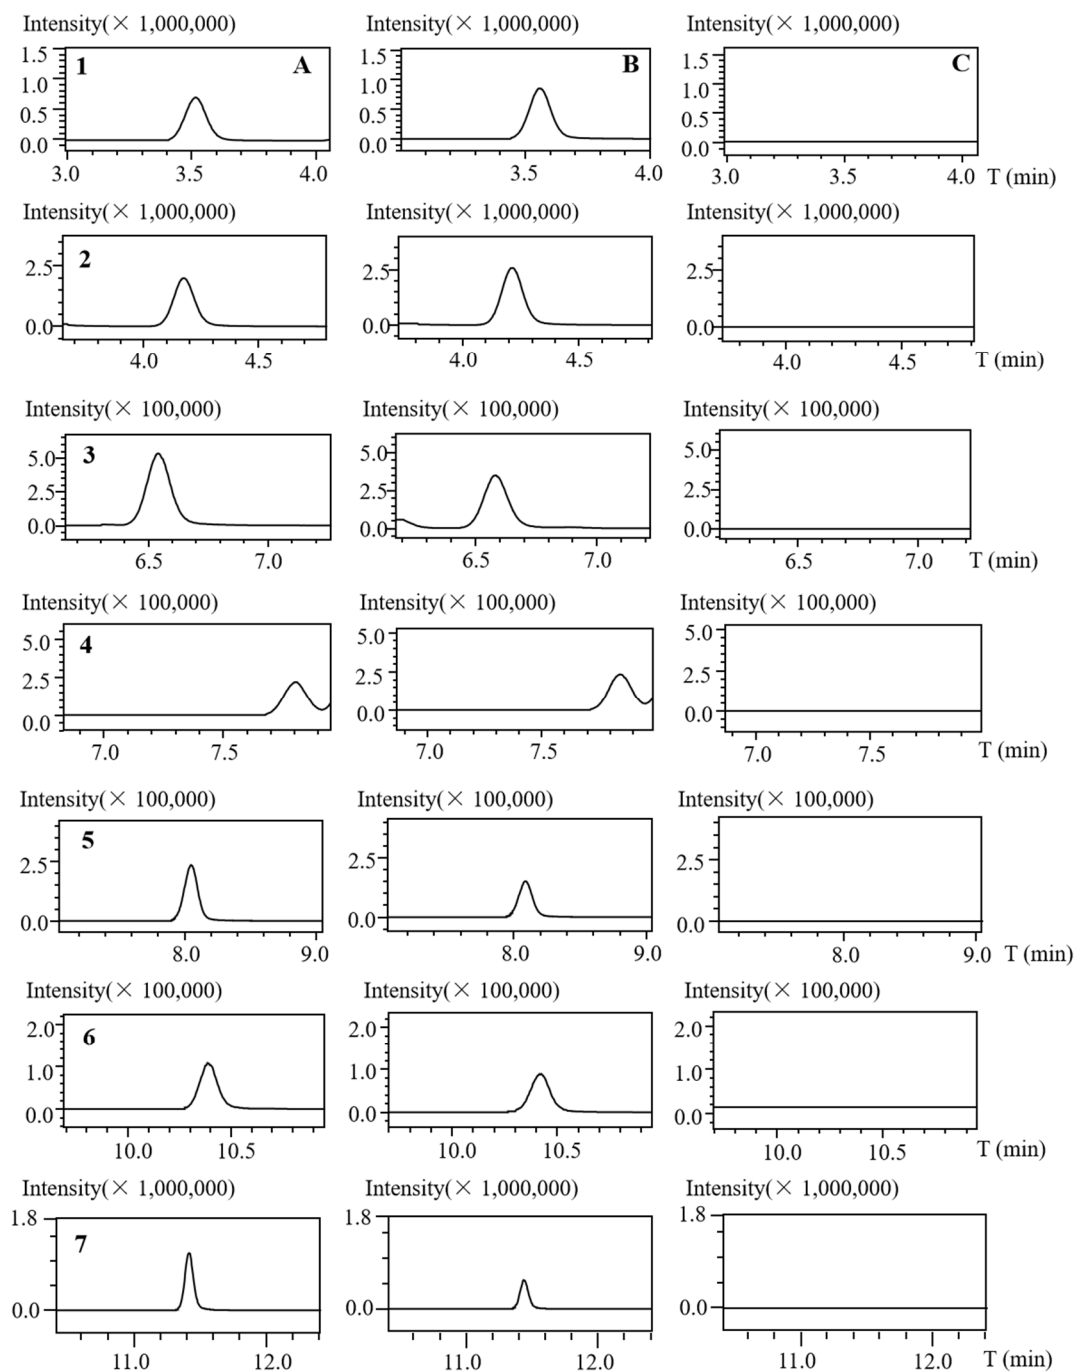

**Figure S1.** GC-MS SIM chromatogram of reference solution ( A ), sample solution ( B ) and blank control solution ( C )

Note: 1:  $\beta$ -Pinene, 2: Sabinene, 3:  $\beta$ -Myrcene, 4: Limonene, 5: Eucalyptol, 6:  $\gamma$ -Terpinene, 7: *p*-Cymene.

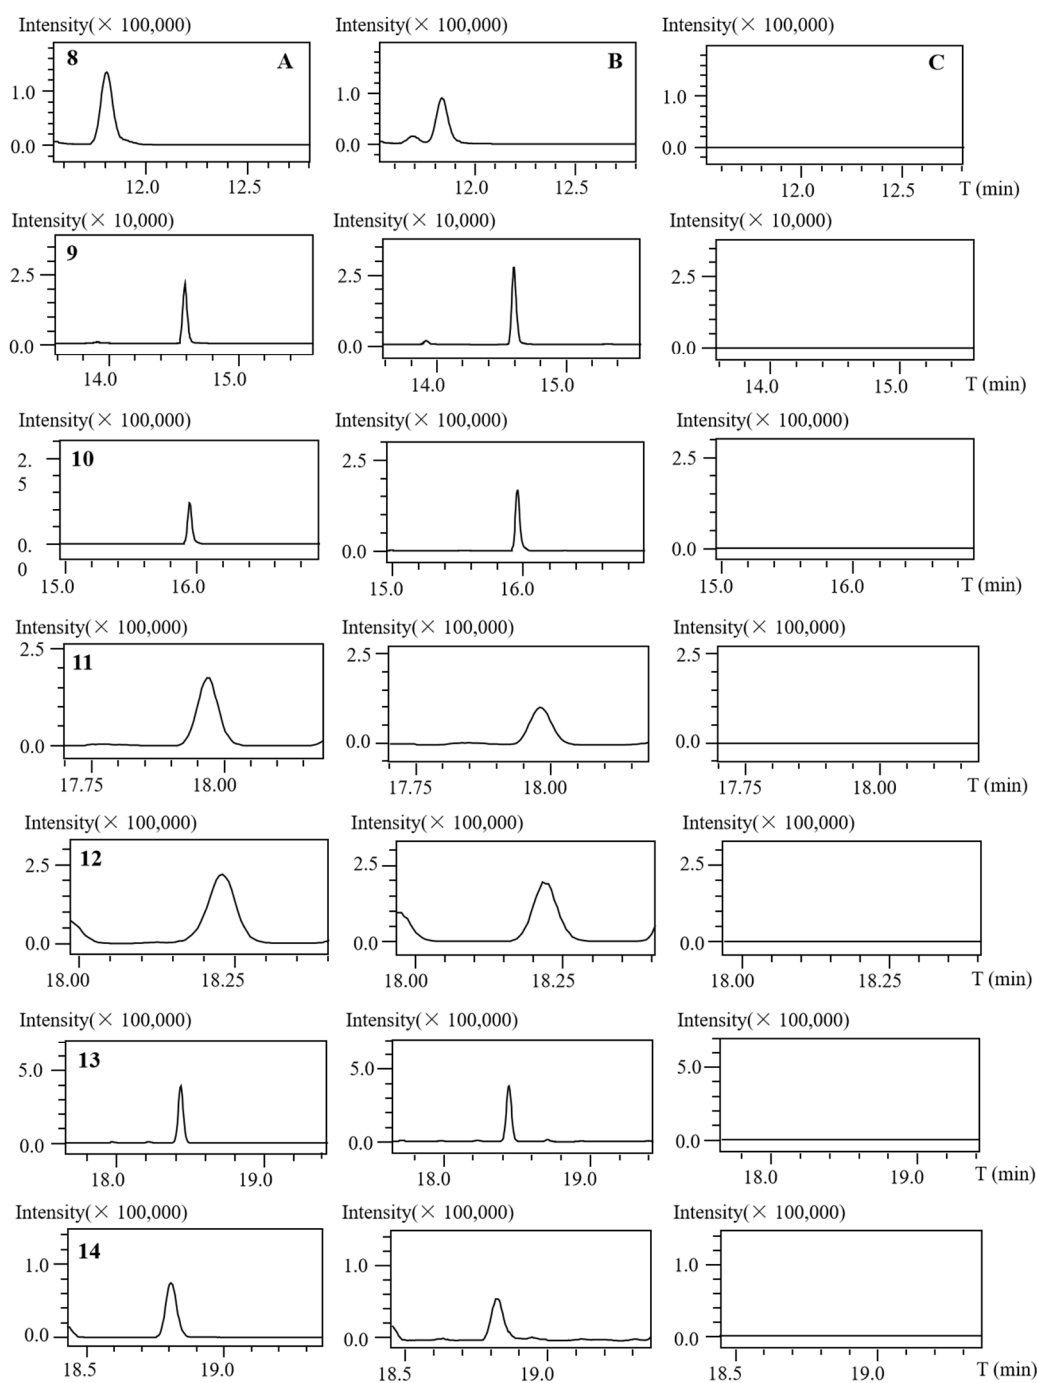

**Figure S1 (continued).** GC-MS SIM chromatogram of reference solution ( A ), sample solution ( B ) and blank control solution ( C )

Note: 8: 4-Carene, 9: 2-Nonanone, 10: 4-Thujanol, 11: Borneol acetate, 12: Caryophyllene, 13: Terpinen-4-ol, 14: Myrtenal

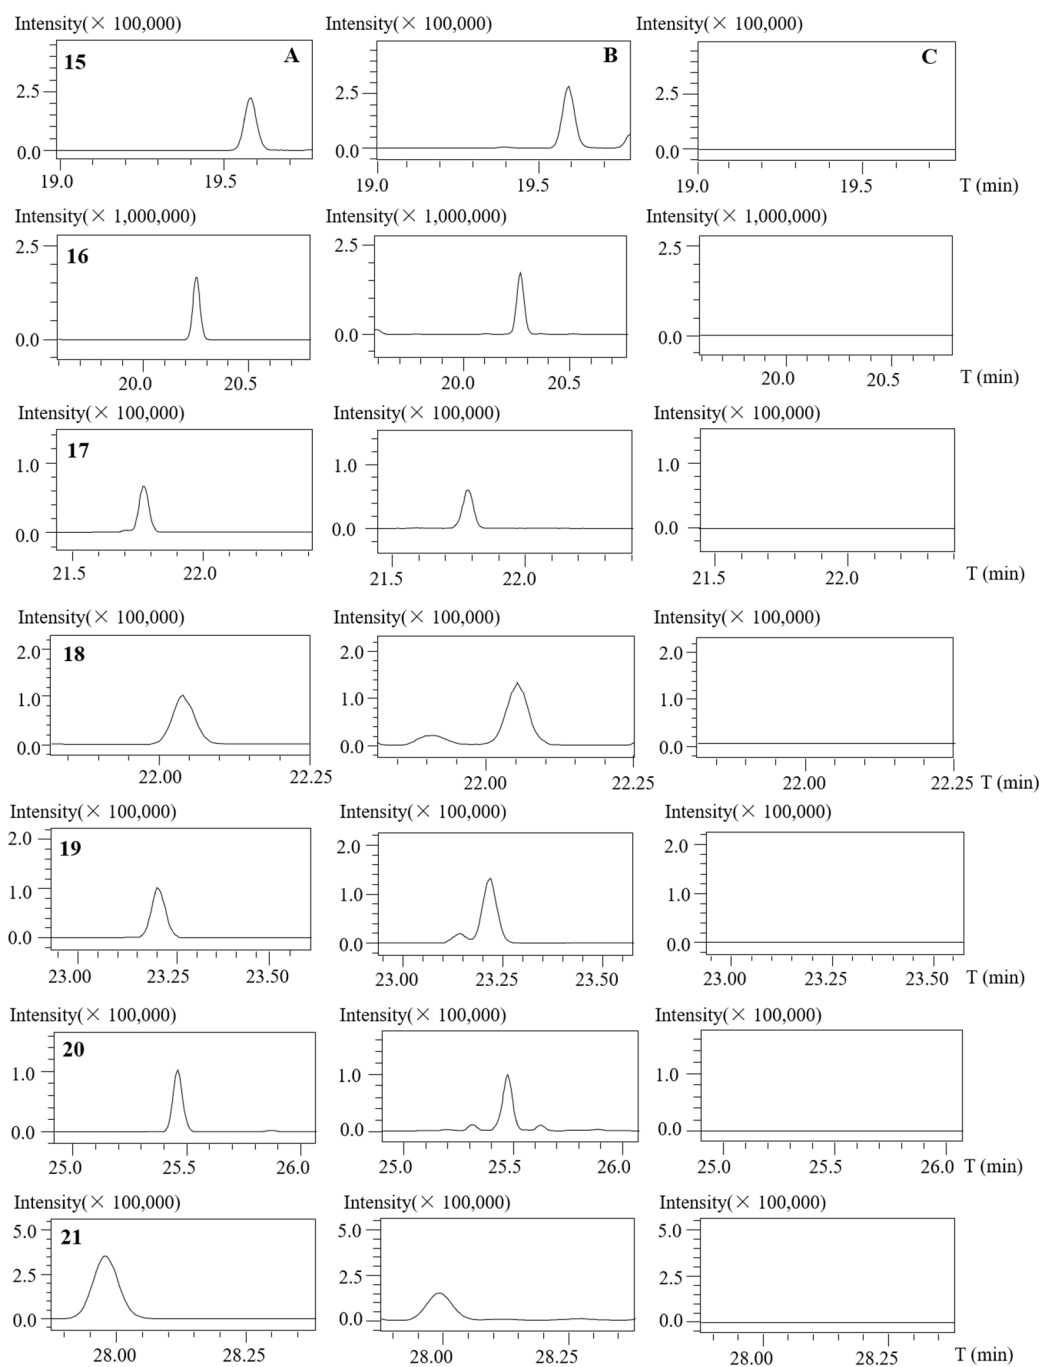

**Figure S1 (continued).** GC-MS SIM chromatogram of reference solution ( A ), sample solution ( B ) and blank control solution ( C )

Note: 15: 4-(1-methylethyl)-2-Cyclohexen-1-one, 16:  $\alpha$ -Terpineol, 17: Cuminaldehyde, 18: Myrtenol, 19: 2-(4-Methylphenyl)propan-2-ol, 20: Caryophyllene oxide, 21: Guaiol
